# Supplementary material
Source: HighWire-hosted journal article supplement (https://genome.cshlp.org/content/suppl/2012/08/22/22.9.1689)
Supplement: Supplemental_Table_1.docx [file Supplemental_Table_1.docx]

**Supplementary Table 1. Summary information of cell lines.**

| **Cell Line** | **Institution** | **Category** | **Number Footprints** | **Number Peaks** | **Included in N/M/SC Analysis** |
| --- | --- | --- | --- | --- | --- |
| 8988t | Duke | Malignant | NA | 196180 | Y |
| A549 | UW | Malignant | NA | 119217 | N |
| A549 | Duke | Malignant | NA | 127739 | N |
| Adult-Th0 | Duke | Primary/Normal | NA | 204817 | Y |
| Adult-Th1 | Duke | Primary/Normal | NA | 284902 | Y |
| AG04449 | UW | Primary/Normal | NA | 166257 | Y |
| AG04450 | UW | Primary/Normal | NA | 148226 | Y |
| AG09309 | UW | Primary/Normal | NA | 201397 | Y |
| AG09319 | UW | Primary/Normal | NA | 141324 | Y |
| AG10803 | UW | Primary/Normal | NA | 171275 | Y |
| AoAF | UW | Primary/Normal | NA | 174032 | Y |
| AosmcSerumfree | Duke | Primary/Normal | NA | 167357 | Y |
| BE-2-C | UW | Primary/Normal | NA | 176124 | Y |
| BJ | UW | Primary/Normal | NA | 162164 | N |
| CACO2 | UW | Malignant | NA | 123048 | Y |
| CD20 | UW | Primary/Normal | NA | 110633 | N |
| CD34 | UW | Multipotent Stem Cell | NA | 164217 | N |
| Chorion | Duke | Primary/Normal | NA | 180605 | N |
| Cll | Duke | Malignant | NA | 97955 | N |
| CMK | UW | Malignant | NA | 133232 | N |
| E-myoblast | Duke | Primary/Normal | NA | 131323 | Y |
| Fibrobl | Duke | Primary/Normal | NA | 407256 | Y |
| Fibrop | Duke | Primary/Normal | NA | 258648 | Y |
| Gliobla | Duke | Malignant | NA | 167960 | Y |
| GM06990 | UW | Immortalized | 434561 | 93463 | Y |
| GM12864 | UW | Immortalized | NA | 137884 | Y |
| GM12865 | UW | Immortalized | 811374 | 143882 | Y |
| GM12878 | UW | Immortalized | NA | 117915 | Y |
| Gm12878 | Duke | Immortalized | NA | 134683 | Y |
| Gm12891 | Duke | Immortalized | NA | 144558 | Y |
| Gm12892 | Duke | Immortalized | NA | 158618 | Y |
| Gm18507 | Duke | Immortalized | NA | 117693 | Y |
| Gm19238 | Duke | Immortalized | NA | 152180 | Y |
| Gm19239 | Duke | Immortalized | NA | 130097 | Y |
| Gm19240 | Duke | Immortalized | NA | 184267 | Y |
| H1hesc | Duke | Pluripotent Stem Cell | NA | 189045 | Y |
| H9es | Duke | Pluripotent Stem Cell | NA | 163824 | Y |
| HAc | UW | Primary/Normal | NA | 180216 | Y |
| HAEpiC | UW | Primary/Normal | 1506475 | 205124 | Y |
| HAh | UW | Primary/Normal | 966188 | 200181 | Y |
| HAsp | UW | Primary/Normal | NA | 195373 | Y |
| HBMEC | UW | Primary/Normal | NA | 199919 | Y |
| HCF | UW | Primary/Normal | 1057743 | 174781 | Y |
| HCFaa | UW | Primary/Normal | NA | 184588 | Y |
| HCM | UW | Primary/Normal | 1130292 | 193489 | Y |
| HConF | UW | Primary/Normal | NA | 153794 | Y |
| HCPEpiC | UW | Primary/Normal | 1296454 | 210465 | Y |
| HCT116 | UW | Malignant | NA | 114252 | Y |
| HEEpiC | UW | Primary/Normal | 1263648 | 209911 | Y |
| Hela | UW | Malignant | NA | 123719 | Y |
| Helas3 | Duke | Malignant | NA | 144769 | Y |
| Helas3Ifna4h | Duke | Malignant | NA | 117383 | Y |
| Hepatocytes | Duke | Primary/Normal | NA | 179285 | Y |
| HepG2 | UW | Malignant | 448678 | 91357 | Y |
| Hepg2 | Duke | Malignant | NA | 170276 | Y |
| HESC | UW | Pluripotent Stem Cell | NA | 151021 | Y |
| hESCT0 | UW | Pluripotent Stem Cell | 1279454 | 266731 | Y |
| HFF | UW | Primary/Normal | 590904 | 192389 | Y |
| HFF-MyC | UW | Malignant | NA | 209928 | Y |
| HGF | UW | Primary/Normal | NA | 145986 | Y |
| HIPEpiC | UW | Primary/Normal | 1089936 | 225828 | Y |
| HL60 | UW | Malignant | NA | 161856 | Y |
| HMEC | UW | Primary/Normal | NA | 141090 | Y |
| Hmec | Duke | Primary/Normal | NA | 282774 | Y |
| HMF | UW | Primary/Normal | NA | 179541 | Y |
| HMVEC-dAd | UW | Primary/Normal | NA | 125454 | Y |
| HMVEC-dBlAd | UW | Primary/Normal | 1085741 | 162702 | Y |
| HMVEC-dBlNeo | UW | Primary/Normal | 1061860 | 168548 | Y |
| HMVEC-dLyAd | UW | Primary/Normal | NA | 127871 | Y |
| HMVEC-dLyNeo | UW | Primary/Normal | 989626 | 153233 | Y |
| HMVEC-dNeo | UW | Primary/Normal | NA | 141204 | Y |
| HMVEC-LBl | UW | Primary/Normal | NA | 170076 | Y |
| HMVEC-LLy | UW | Primary/Normal | 872721 | 145038 | Y |
| HNPCEpiC | UW | Primary/Normal | NA | 212499 | Y |
| HPAEC | UW | Primary/Normal | NA | 124069 | Y |
| HPAF | UW | Primary/Normal | 1090215 | 188187 | Y |
| Hpde6e6e7 | Duke | Malignant | NA | 141214 | Y |
| HPdLF | UW | Primary/Normal | 1404872 | 171459 | Y |
| HPF | UW | Primary/Normal | 1175289 | 154523 | Y |
| HRCE | UW | Primary/Normal | 1187325 | 192212 | Y |
| HRE | UW | Primary/Normal | NA | 187214 | Y |
| HRGEC | UW | Primary/Normal | NA | 137958 | Y |
| HRPEpiC | UW | Primary/Normal | NA | 227189 | N |
| HSMM | UW | Primary/Normal | 1668243 | 228340 | Y |
| Hsmm | Duke | Primary/Normal | NA | 161360 | Y |
| HSMM-D | UW | Primary/Normal | NA | 247657 | Y |
| Hsmmt | Duke | Primary/Normal | NA | 178809 | Y |
| hTH1 | UW | Primary/Normal | 498505 | 84767 | Y |
| hTH2 | UW | Primary/Normal | NA | 91930 | Y |
| Htr8 | Duke | Immortalized | NA | 129699 | N |
| Huh7 | Duke | Malignant | NA | 153887 | N |
| Huh75 | Duke | Malignant | NA | 182986 | N |
| HUVEC | UW | Primary/Normal | NA | 119424 | Y |
| Huvec | Duke | Primary/Normal | NA | 149726 | N |
| HVMF | UW | Primary/Normal | 1263833 | 170492 | N |
| Ips | Duke | Pluripotent Stem Cell | NA | 203810 | Y |
| Ishikawa-E | Duke | Malignant | NA | 140650 | N |
| Ishikawa-T | Duke | Malignant | NA | 143760 | N |
| Jurkat | UW | Malignant | NA | 159753 | N |
| K562 | UW | Malignant | 498683 | 143183 | N |
| K562 | Duke | Malignant | NA | 122958 | N |
| LNCap | UW | Malignant | NA | 183318 | N |
| Lncap | Duke | Malignant | NA | 199131 | N |
| LncapAndro | Duke | Malignant | NA | 148213 | Y |
| MCF7 | UW | Malignant | NA | 126838 | Y |
| Mcf7 | Duke | Malignant | NA | 146567 | N |
| Mcf7Hypoxlac | Duke | Malignant | NA | 153344 | Y |
| Medullo | Duke | Malignant | NA | 228510 | N |
| Melano | Duke | Primary/Normal | NA | 286491 | N |
| Myometr | Duke | Primary/Normal | NA | 174042 | N |
| NB4 | UW | Malignant | 1049300 | 143952 | N |
| NHA | UW | Primary/Normal | 977923 | 191583 | N |
| NHDF-Ad | UW | Primary/Normal | 1429399 | 230752 | N |
| NHDF-Neo | UW | Primary/Normal | 1532853 | 188057 | N |
| NHEK | UW | Primary/Normal | NA | 145336 | N |
| Nhek | Duke | Primary/Normal | NA | 160082 | N |
| NHLF | UW | Primary/Normal | 1567106 | 206309 | N |
| NT2-D1 | UW | Malignant | NA | 184397 | Y |
| Osteobl | Duke | Primary/Normal | NA | 391273 | N |
| PANC1 | UW | Malignant | NA | 117019 | N |
| Panisd | Duke | Primary/Normal | NA | 207301 | Y |
| Panislets | Duke | Primary/Normal | NA | 181241 | N |
| Phte | Duke | Primary/Normal | NA | 272612 | Y |
| PrEC | UW | Primary/Normal | NA | 167728 | Y |
| Progfib | Duke | Primary/Normal | NA | 211409 | N |
| RPTEC | UW | Primary/Normal | NA | 169414 | N |
| RWPE | Duke | Malignant | NA | 154398 | N |
| SAEC | UW | Primary/Normal | 1256188 | 198500 | N |
| SK-N-MC | UW | Malignant | NA | 146661 | N |
| SkMC | UW | Primary/Normal | 2370723 | 205571 | N |
| SKNSH | UW | Malignant | 498926 | 90398 | N |
| Stellate | Duke | Primary/Normal | NA | 166575 | N |
| T47d | Duke | Malignant | NA | 150896 | N |
| Urotsa | Duke | Malignant | NA | 146333 | Y |
| UrotsaUt189 | Duke | Malignant | NA | 180383 | N |
| WERI-Rb1 | UW | Malignant | NA | 191456 | N |
| WI-38 | UW | Immortalized | NA | 166501 | Y |
| WI-38-TAM | UW | Immortalized | NA | 205421 | Y |

Note, Institution refers to the location of where the DNAseI data was generated (UW = University of Washington, Duke = Duke University). For some analyses, Malignant and Immortalized cell types were grouped together. In all analyses, pluripotent and multipotent cell lines were grouped together as “iPS/ES”. Finally, the last column indicates whether the cell line was used in the analysis comparing characteristics of Primary/Normal, Malignant, and iPS/ES cell type categories.
