# Supplementary material
Source: HighWire-hosted journal article supplement (https://genome.cshlp.org/content/suppl/2012/08/22/22.9.1689)
Supplement: Supplemental_Table_2.docx [file Supplemental_Table_2.docx]

**Supplementary Table 2. Summary information of whole-genome sequence information.**

| **Population** | **Description** | **N** | **Sample IDs** |
| --- | --- | --- | --- |
| YRI | Yoruba in Ibadan, Nigeria | 9 | GS19238-1100-37-ASM, GS19239-1100-37-ASM, GS18501-1100-37-ASM, GS18502-1100-37-ASM, GS18504-1100-37-ASM, GS18505-1100-37-ASM, GS18508-1100-37-ASM, GS18517-1100-37-ASM, GS19129-1100-37-ASM |
| LWK | Luhya in Webuye, Kenya | 4 | GS19017-1100-37-ASM, GS19020-1100-37-ASM, GS19025-1100-37-ASM, GS19026-1100-37-ASM |
| MKK | Maasai in Kinyawa, Kenya | 3 | GS21732-1100-37-ASM, GS21733-1100-37-ASM, GS21767-1100-37-ASM |
| ASW | African ancestry in Southwest USA | 5 | GS19700-1100-37-ASM, GS19701-1100-37-ASM, GS19703-1100-37-ASM, GS19704-1100-37-ASM, GS19834-1100-37-ASM |
| CEU | Utah residents with Northern and Western European ancestry from the CEPH collection | 9 | GS12889-1100-37-ASM, GS12890-1100-37-ASM, GS12891-1100-37-ASM, GS12892-1100-37-ASM, GS06985-1100-37-ASM, GS06994-1100-37-ASM, GS07357-1100-37-ASM, GS10851-1100-37-ASM, GS12004-1100-37-ASM |
| TSI | Tuscans in Italy | 4 | GS20502-1100-37-ASM, GS20509-1100-37-ASM, GS20510-1100-37-ASM, GS20511-1100-37-ASM |
| JPT | Japanese in Tokyo, Japan | 4 | GS18940-1100-37-ASM, GS18942-1100-37-ASM, GS18947-1100-37-ASM, GS18956-1100-37-ASM |
| CHB | Han Chinese in Beijing, China | 4 | GS18526-1100-37-ASM, GS18537-1100-37-ASM, GS18555-1100-37-ASM, GS18558-1100-37-ASM |
| GIH | Gujarati Indian in Houston, Texas, USA | 4 | GS20845-1100-37-ASM, GS20846-1100-37-ASM, GS20847-1100-37-ASM, GS20850-1100-37-ASM |
| MXL | Mexican ancestry in Los Angeles, California | 5 | GS19735-1100-37-ASM, GS19648-1100-37-ASM, GS19649-1100-37-ASM, GS19669-1100-37-ASM, GS19670-1100-37-ASM |
| PUR | Puerto Rican in Puerto Rico | 2 | HG00731-1100-37-ASM, HG00732-1100-37-ASM |

Notes: In the analysis of population structure, we combined the YRI, LWK, and MKK into a single “African” population, the CEU and TSI into a single “European” population, and JPT and CHB into a single “Asian” population.
